1 **The common chromosomal periodicity of transcriptomes is correlated**  
2 **with the bacterial growth rate**

3

4 Motoki Nagai, Masaomi Kurokawa, Bei-Wen Ying\*

5

6 Graduate School of Life and Environmental Sciences, University of Tsukuba, 1-1-1

7 Tennoudai, Tsukuba, Ibaraki 305-8572, Japan

8

9 \*Correspondence: [ying.beiwen.gf@u.tsukuba.ac.jp](mailto:ying.beiwen.gf@u.tsukuba.ac.jp) (BWY)

10 **Abstract**

11 The growth rate, representing the fitness of a bacterial population, is determined by  
12 the whole transcriptome. Chromosomal periodicity is a representative overall feature of  
13 the whole transcriptome; however, whether and how it is associated with the bacterial  
14 growth rate are unknown. To address these questions, we analyzed a total of 213  
15 transcriptomes of genetically differentiated *Escherichia coli* strains growing in an  
16 assortment of culture conditions varying in terms of temperature, nutrition level and  
17 osmotic pressure. Intriguingly, the Fourier transform identified a common chromosomal  
18 periodicity of transcriptomes, which was independent of the variation in genomes and  
19 environments. In addition, fitting of the theoretical model found that the amplitudes of  
20 the periodic transcriptomes were significantly correlated with the growth rates. This  
21 novel finding successfully identified a single parameter representing the global pattern  
22 of the whole transcriptome for the first time and indicated that bacterial growth was  
23 correlated with the magnitude of chromosomal differentiation in gene expression. These  
24 results provided an alternative global parameter for evaluating the adaptiveness of a  
25 growing bacterial population and provided a quantitative rule that makes it possible to  
26 predict the growth dynamics according to the gene expression pattern.

27

28 **Keywords:** chromosomal periodicity, transcriptome, growth rate, population fitness

## 29 **Introduction**

30 The growth rate in the exponentially growing phase is the most important parameter  
31 representing both genetic and environmental influences on bacterial growth dynamics.  
32 Predicting the growth rate of a growing bacterial population according to the intrinsic  
33 status and/or extrinsic conditions is highly desirable. To date, extensive studies  
34 involving the systematic quantitative investigation of bacterial growth have been  
35 performed. By using systematic genetic constructs, e.g., single-gene knockout<sup>1</sup> and  
36 genome reduction,<sup>2,3</sup> the contributions of both single genes and large genomic  
37 fragments to bacterial growth were quantitatively evaluated<sup>4-6</sup>. The finding of a  
38 correlation between the genome and the growth rate strongly suggests that population  
39 fitness is linked to genome-wide features in vivo<sup>5,7</sup>.

40 The transcriptome, which illustrates a global view of the transcriptional abundance of  
41 all the genes distributed in the genome, is reorganized constantly in response to genomic  
42 and environmental perturbations<sup>8-10</sup>. As the transcriptome is known to be associated  
43 with population fitness<sup>11-13</sup>, the contribution of the transcriptome to population fitness  
44 is of great interest. Our previous studies reported the coordination of gene expression  
45 with the growth rate<sup>13</sup> and the linkage between transcriptome reorganization and  
46 increases in fitness in adaptation and evolution<sup>14,15</sup>. These findings indicated that the  
47 whole transcriptome, rather than the specific regulation of limited gene groups,  
48 increased population fitness. Whether and how the whole transcriptome is linked to  
49 population fitness remains unknown.

50 A single parameter representing the whole transcriptome is critical for determining  
51 the linkage if it exists. Previous studies successfully demonstrated that the power law  
52 (Zipf's rule) was a universal principle governing the transcriptome in living organisms  
53<sup>16,17</sup>; however, we failed to find the linkage between this law and the growth rate<sup>18</sup>. As  
54 an alternative global feature representing the transcriptome, chromosomal periodicity  
55 has been proposed<sup>19,20</sup>, which is determined using the Fourier transform, a  
56 mathematical method used to estimate the periodic patterns in an entire dataset  
57 according to the sinusoidal wave<sup>21</sup>. Computational analyses identified some particular  
58 periods associated with bacterial transcriptomes<sup>19,20</sup>, which were supported by the  
59 molecular functions and/or mechanisms related to the chromosomal topology<sup>22-24</sup>.  
60 These findings of chromosomal periodicity were used to obtain static snapshots of the  
61 whole transcriptome, and whether and how the chromosomal periodicity of the  
62 transcriptome is linked to the growth rate are under investigation.

63 In the present study, a total of 213 growth profile-associated transcriptomes were  
64 analyzed that represent an assortment of genetically differentiated *E. coli* cells growing

65 under or responding to various environments. This study seeks to determine whether the  
66 chromosomal periodicity of the transcriptome is robust or plastic in response to  
67 environmental and genetic differentiation and whether and how chromosomal  
68 periodicity is coordinated with bacterial growth.

69

## 70 **Materials and Methods**

### 71 *E. coli* strains and growth conditions

72 Three types of *E. coli* genomes were included in the transcriptome analyses: the  
73 full-length genomes of MG1655 and DH1 and the partial genome of MDS42<sup>2</sup>. A  
74 number of genetically engineered strains were comprised of genomes of types DH1<sup>14,25</sup>  
75 and MDS42<sup>13</sup>, which led to a total of 20 different genomic backgrounds. The growth  
76 media were all based on the minimal medium M63<sup>26</sup>; if required, the medium was  
77 supplemented with factors, including amino acids, to compensate for the interruption of  
78 gene function resulting from genetic engineering. In addition, the growth temperature  
79 was also varied. Nine different media and seven different temperatures were used,  
80 which resulted in a total of 16 different environmental conditions. The *E. coli* growth  
81 status was evaluated in the exponential growth phase and the stress response phase.  
82 Only the transcriptomes associated with the exponential growth phase were linked with  
83 precise growth rates (165 transcriptomes) and were subjected to correlation analysis.  
84 The details of the genomic backgrounds and the environmental conditions can be found  
85 in previous reports<sup>13-15,18,25,27,28</sup>.

86

### 87 *Transcriptomes*

88 The transcriptomes used in the present study were acquired from microarray raw data  
89 sets assigned the GEO access numbers of GSE33212, GSE49296, GSE55719,  
90 GSE52770 and GSE61749 by using the customized platform EcFS<sup>29</sup>. The finite  
91 hybridization model<sup>30</sup> was applied to determine the gene expression levels, which were  
92 calculated as the log-scale mRNA concentrations (pM). Data filtering, normalization  
93 and averaging of the biological replicates for the subsequent transcriptome analyses  
94 were described previously. The resulting transcriptomes were associated with the  
95 growth profiles, genomic backgrounds and environmental conditions. The details were  
96 previously described in the corresponding studies<sup>13-15,25,27</sup>. A total of 213 transcriptomes,  
97 comprising 72 combinations (biological repetition, N=2~7) that varied in terms of the  
98 genomic background and environmental conditions as described above, were included  
99 in the analyses.

100

### 101 *Computational analyses*

102 All computational analyses were performed with R<sup>31</sup>. The gene expression levels on  
103 a logarithmic scale were used for the analyses as described previously<sup>18,32</sup>. A total of  
104 165 transcriptomes representing the exponential growth phase associated with the  
105 repeated growth assay were subjected to correlation analysis of the growth rate (**r**) and  
106 the periodic parameters (**a**, **b** and **c**). This resulted in 42 combinations of genomic and  
107 environmental variations. The statistical significance of the Pearson correlation  
108 coefficients was evaluated by the t-test. The Z-score was used for the standardization of  
109 the MG1655 transcriptomes obtained from the present data sets and the GyrA Chip-seq  
110 data for MG1655 obtained from another study<sup>20</sup>. The Z-scores of both the gene  
111 expression and the GyrA binding activity were calculated and were averaged with a  
112 sliding distance of 1 kb for the correlation analysis and the Fourier transform.

113

### 114 *Evaluation of chromosomal periodicity*

115 A standard Fourier transform was employed to determine the chromosomal periodicity  
116 of the transcriptomes and the GyrA binding activity by using the periodogram function  
117 in R. All 213 transcriptomes were subjected to the Fourier transform, in which the  
118 expression data for 4393, 3760 and 4377 genes in the *E. coli* strains with the genomic  
119 backgrounds of MG1655, MDS42 and DH1 were used, respectively. The CDS  
120 information for MG1655, MDS42 and DH1 were obtained from the DDBJ databanks  
121 under the accession IDs U00096, AP012306 and AP012030, respectively. The sizes of  
122 the genomes used for the Fourier transform were 4642, 3976 and 4622 kb and  
123 corresponded to the genomic backgrounds of MG1655, MDS42 and DH1, respectively.  
124 The chromosomal periodicities of both the transcriptomes and the GyrA binding activity  
125 were evaluated with a sliding distance of 1 kb and are shown in 100-kb bins. The  
126 approximate curves of the periodicity were calculated using the highest peak of the  
127 periodogram and were fitted by minimizing the square error of the approximate curve  
128 and the series of expression values. The statistical significance of the periodicity was  
129 assessed with Fisher's g test<sup>21</sup>, which was performed using the GeneCycle package in  
130 R.

131

## 132 **Results and Discussion**

### 133 *The common chromosomal periodicity of the transcriptome*

134 To investigate whether the growth conditions and the genomic background influenced  
135 the chromosomal periodicity of the transcriptome, a total of 213 *E. coli* transcriptome  
136 data sets, which were associated with the growth profiles and were acquired with the

137 same microarray platform, were used in the present study. The growth conditions were  
138 varied in terms of temperature, nutrition level and osmotic pressure, and there was a  
139 large variation in the genomic backgrounds (as described in the Materials and Methods).  
140 Chromosomal fluctuations in gene expression were confirmed (Fig. 1A), and  
141 chromosomal periodicity was evaluated with the Fourier transform.

142 Intriguingly, the analysis results showed the high level of common chromosomal  
143 periodicity of the transcriptomes, which was independent of the growth conditions and  
144 the genomic backgrounds. For instance, the most significant spectral powers (*i.e.*, the  
145 max peak) identified in two transcriptomes associated with different growth rates ( $r$ )  
146 were exactly the same (Fig. 1B, left panels). Consequently, this resulted in an identical  
147 chromosomal periodicity (Fig. 1B, right panels), although the two transcriptomes  
148 represented the *E. coli* cells growing at different temperatures. Overall, 202 out of 213  
149 transcriptomes presented a universal chromosomal periodicity of six periods (Fig. 1C)  
150 as the highest priority in the Fourier transform. Of note, all 11 exceptions showed a  
151 chromosomal periodicity of six periods as the second priority. As the statistical  
152 significance of the chromosomal periodicity was further proven by Fisher's g test for all  
153 transcriptomes (Fig. S1), the determination of the common chromosomal periodicity of  
154 transcriptomes, which consisted of six periods, was highly reliable. This result agreed  
155 with those of previous studies reporting periodic transcriptomes either in wild-type *E.*  
156 *coli* strains or under regular growth conditions<sup>20,27,33</sup>.

157 In addition, the periodicity of the chromosomal dynamics of the transcriptomes was  
158 somehow synchronized. Despite the large variation in both the genomic backgrounds of  
159 the *E. coli* strains and the environmental conditions of the population growth, the six  
160 periods of a total of 202 transcriptomes almost overlapped (Fig. 1D). The similar  
161 directional changes in gene expression among the genomic positions further  
162 demonstrated the universality of the chromosomal periodicity of the transcriptomes  
163 irrespective of genetic and environmental disturbances. This was the first finding that  
164 revealed that neither the number nor the wavelength of the periods was linked to  
165 bacterial growth.

166

#### 167 *Correlation between the growth rate and the amplitude of the periodic transcriptome*

168 Whether there was any parameter representative of the periodic transcriptomes linked to  
169 bacterial growth was further investigated. The gene expression level,  $Exp(x)$ , was  
170 related to the genome position ( $x$ ) of the corresponding gene. The parameters affecting  
171 the chromosomal periodicity of the transcriptome were theoretically defined in the  
172 following formula (Eq. 1).

$$173 \quad \text{Exp}(x) = a \times \sin\left(\frac{x+b}{T} \times 2\pi\right) + c \quad \text{Eq. 1}$$

174 Here, the parameters **a**, **b**, and **c** represented the amplitude of the period, the phase of  
175 the period (i.e., the genomic position of the period initiation), and the mean  
176 transcriptional level, respectively (Fig. 2A). The estimation of the three parameters was  
177 performed by minimizing the square error in the curve fitting. The constant T was the  
178 wavelength of the period of the highest spectral power estimated by the Fourier  
179 transform. A total of 165 transcriptomes, which represented the exponential growth  
180 phase and were associated with highly precise growth rates (**r**), were subjected to  
181 theoretical fitting with Eq. 1.

182 The theoretical fitting successfully identified a significant correlation between the  
183 growth rate and the amplitude of the periodic transcriptome. The values of **a**, **b** and **c**  
184 calculated by curve fitting were averaged among the biological repeats, which led to 42  
185 combinations that varied in terms of the genomic background and/or environmental  
186 conditions. Note that parameter **b** was further normalized because of the variation in the  
187 genome length. The parameter **a** was positively correlated with the growth rate (Fig.  
188 2B), whereas such a correlation was not detected for the parameters **b** and **c** (Fig. S2).  
189 The analysis clearly determined a simple correlation between the growth rate and the  
190 amplitude of the period, although the 165 transcriptomes with 42 combinations largely  
191 differed in terms of the genotypes and environments. This strongly suggested that  
192 population fitness was correlated with the magnitude of differential transcription along  
193 the chromosome.

194 Further investigations of the contributions of the genomic background and the  
195 environmental conditions failed to observe any significant relationship with the growth  
196 rate. According to previous reports<sup>13-15,18,25</sup>, four types of environmental variations were  
197 roughly categorized as normal conditions and conditions with changes in temperature,  
198 nutrition level and osmotic pressure. The distributions of the four parameters  
199 representing the growth and the periodicity of the transcriptome were largely dissimilar  
200 among the four categories (Fig. 2C), which reflected the properties of the data sets. No  
201 environmentally dependent feature or correlation among the parameters **a**, **b**, and **c** was  
202 found (Fig. 2C). Additionally, genetic engineering might affect the phase of the period  
203 (i.e., normalized **b**), as a difference was detected between the wild-type genome and the  
204 other genomes (Fig. S3). The genetic reconstruction possibly interrupted the genomic  
205 position of the period initiation, although more datasets were required to support this  
206 assumption.

207

208 *Mechanisms of the universal chromosomal periodicity of transcriptomes*

209 To understand the universality of the periodicity of transcriptomes, a simple  
210 assumption was made that the essential genes determined the six periods. However,  
211 neither deleting the essential genes from the transcriptome data nor substituting the true  
212 expression values with zero altered the common periodicity of the transcriptome (Fig.  
213 S4). This result indicated that the periodicity of the transcriptome was not simply due to  
214 the genomic localization of the essential genes, although it is unclear whether and how  
215 the absence of the essential genes triggered the transcriptional changes of the  
216 nonessential genes, as deleting the essential genes from the genome was impractical.

217 As the chromosomal structure might contribute to transcriptional activity<sup>32,34-36</sup>,  
218 whether the common chromosomal periodicity of the transcriptome was attributed to the  
219 chromosomal organization was determined. The macrodomain model was proposed for  
220 the *E. coli* chromosome, with four structured domains and two nonstructural regions  
221<sup>37-40</sup>. The normalized periodicity of the transcriptomes showed that the six periods were  
222 roughly positioned within the six domain regions of the *E. coli* chromosome (Fig. 3A),  
223 which was consistent with previous findings<sup>20,27,33</sup>. The highly overlapping phases of  
224 the periodic transcriptome (Fig. 3A) suggested that the chromosomal macrodomain  
225 structure was robust against genomic and environmental disturbances.

226 Moreover, the molecular mechanism related to the DNA topology probably played a  
227 role in determining the chromosomal periodicity of the transcriptome. Bacterial  
228 chromosomal structures are highly dynamic and compacted in association with  
229 nucleoid-associated proteins (NAPs). Previous studies indicated that the chromosomal  
230 supercoiling of domains ~10 kb size<sup>20,22</sup> was potentially attributed to the chromosomal  
231 localization of nucleoid-associated proteins, *e.g.*, H-NS<sup>41</sup>, and that of domain 600~800  
232 kb size might be triggered by DNA gyrase<sup>20</sup>. As the common period identified in the  
233 present study was ~700 kb, the participation of the subunit of the DNA gyrase, GyrA,  
234 was confirmed. A highly significant correlation was verified between the transcriptome  
235 of the wild-type strain MG1655 in the present study and the abundance of  
236 chromosomally bound GyrA in a previous report<sup>20</sup> (Fig. 3B). Such a correlation seemed  
237 to be common in all transcriptomes (Fig. S5) if the properties of the binding of GyrA to  
238 the genome remained unchanged. The correlation between gene expression and binding  
239 activity suggested the similarity of the chromosomal periodicity of GyrA binding and  
240 that of the transcriptome. Although the six periods were not the first priority for GyrA  
241 binding (Fig. S6), the chromosomal periodicities of GyrA binding activity and the  
242 transcriptome in MG1655 were somehow coordinated (Fig. 3C).

243



244 *Linking the periodicity of the transcriptome to population fitness*

245 The present study successfully found a direct linkage between population dynamics  
246 and the whole transcriptome (Fig. 4). The whole transcriptome is influenced by both the  
247 genomic background and the environmental conditions; consequently, it determines  
248 bacterial growth. Previous studies of transcriptomes successfully classified the genes  
249 into diverse categories that functioned either specifically in response to environmental  
250 changes or generally in relation to the growth rate<sup>11-13</sup>. However, whether there was any  
251 quantitative relationship directly linking the two global features of growth and the  
252 transcriptome remained unaddressed.

253 The present study first identified a single parameter that represented well the global  
254 features of the whole transcriptome. That is, the amplitude of the chromosomal  
255 periodicity of the transcriptome represents the magnitude of the chromosomal  
256 differentiation of gene expression. Moreover, fast growth was linked to a large  
257 amplitude of the periodic transcriptome (Fig. 4, solid curves). The correlation between  
258 the growth rates and the amplitudes of periodic transcriptomes was independent of the  
259 environmental conditions and the genomic backgrounds. This novel finding was a  
260 breakthrough for understanding how the whole transcriptome determined population  
261 fitness because it was the first demonstration that the magnitude of chromosomal  
262 differentiation of gene expression was correlated with the growth rate.

263 The growth rate was the only global parameter representing the adaptiveness of a  
264 growing bacterial population. The amplitude of the periodic transcriptome could be  
265 considered an alternative global parameter for evaluating population fitness. In addition  
266 to network reconstruction<sup>42</sup>, the assessment of the global pattern of the whole  
267 transcriptome might be applied for predicting population fitness, which would be  
268 beneficial for industrial applications to substrate production and the fundamental  
269 investigation of living principles.

270

271 **Acknowledgments**

272 We thank Shigeto Seno for the programming assistance. This work was supported by  
273 the JSPS KAKENHI Grant-in-Aid for Scientific Research (B) (grant number 19H03215  
274 (to BWY)).

275

276 **Competing interests**

277 The authors declare that there are no competing interests.

278

279 **References**

- 280 1. Baba, T., Ara, T., Hasegawa, M., et al. 2006, Construction of Escherichia coli  
281 K-12 in-frame, single-gene knockout mutants: the Keio collection. *Molecular*  
282 *systems biology*, **2**, 2006 0008.
- 283 2. Posfai, G., Plunkett, G., 3rd, Feher, T., et al. 2006, Emergent properties of  
284 reduced-genome Escherichia coli. *Science*, **312**, 1044-1046.
- 285 3. Kato, J. and Hashimoto, M. 2007, Construction of consecutive deletions of the  
286 Escherichia coli chromosome. *Molecular systems biology*, **3**, 132.
- 287 4. Karcagi, I., Draskovits, G., Umenhoffer, K., et al. 2016, Indispensability of  
288 Horizontally Transferred Genes and Its Impact on Bacterial Genome  
289 Streamlining. *Molecular biology and evolution*, **33**, 1257-1269.
- 290 5. Kurokawa, M., Seno, S., Matsuda, H. and Ying, B. W. 2016, Correlation  
291 between genome reduction and bacterial growth. *DNA research : an*  
292 *international journal for rapid publication of reports on genes and genomes*, **23**,  
293 517-525.
- 294 6. Campos, M., Govers, S. K., Irnov, I., Dobihal, G. S., Cornet, F. and  
295 Jacobs-Wagner, C. 2018, Genomewide phenotypic analysis of growth, cell  
296 morphogenesis, and cell cycle events in Escherichia coli. *Molecular systems*  
297 *biology*, **14**, e7573.
- 298 7. Nishimura, I., Kurokawa, M., Liu, L. and Ying, B. W. 2017, Coordinated  
299 changes in mutation and growth rates induced by genome reduction. *mBio*, **8**.
- 300 8. Gibson, G. 2008, The environmental contribution to gene expression profiles.  
301 *Nature reviews. Genetics*, **9**, 575-581.
- 302 9. Jozefczuk, S., Klie, S., Catchpole, G., et al. 2010, Metabolomic and  
303 transcriptomic stress response of Escherichia coli. *Molecular systems biology*, **6**,  
304 364.
- 305 10. Feugeas, J. P., Turret, J., Launay, A., et al. 2016, Links between Transcription,  
306 Environmental Adaptation and Gene Variability in Escherichia coli: Correlations  
307 between Gene Expression and Gene Variability Reflect Growth Efficiencies.  
308 *Molecular biology and evolution*.
- 309 11. Lopez-Maury, L., Marguerat, S. and Bahler, J. 2008, Tuning gene expression to  
310 changing environments: from rapid responses to evolutionary adaptation. *Nature*  
311 *reviews. Genetics*, **9**, 583-593.
- 312 12. Nahku, R., Valgepea, K., Lahtvee, P. J., et al. 2010, Specific growth rate  
313 dependent transcriptome profiling of Escherichia coli K12 MG1655 in  
314 accelerostat cultures. *Journal of biotechnology*, **145**, 60-65.
- 315 13. Matsumoto, Y., Murakami, Y., Tsuru, S., Ying, B. W. and Yomo, T. 2013, Growth

- 316 rate-coordinated transcriptome reorganization in bacteria. *BMC genomics*, **14**,  
317 808.
- 318 14. Murakami, Y., Matsumoto, Y., Tsuru, S., Ying, B. W. and Yomo, T. 2015, Global  
319 coordination in adaptation to gene rewiring. *Nucleic acids research*, **43**,  
320 1304-1316.
- 321 15. Ying, B. W., Matsumoto, Y., Kitahara, K., et al. 2015, Bacterial transcriptome  
322 reorganization in thermal adaptive evolution. *BMC genomics*, **16**, 802.
- 323 16. Furusawa, C. and Kaneko, K. 2003, Zipf's law in gene expression. *Phys Rev Lett*,  
324 **90**, 088102.
- 325 17. Ueda, H. R., Hayashi, S., Matsuyama, S., et al. 2004, Universality and flexibility  
326 in gene expression from bacteria to human. *Proceedings of the National  
327 Academy of Sciences of the United States of America*, **101**, 3765-3769.
- 328 18. Ying, B. W. and Yama, K. 2018, Gene Expression Order Attributed to Genome  
329 Reduction and the Steady Cellular State in Escherichia coli. *Frontiers in  
330 microbiology*, **9**, 2255.
- 331 19. Allen, T. E., Herrgard, M. J., Liu, M., et al. 2003, Genome-scale analysis of the  
332 uses of the Escherichia coli genome: model-driven analysis of heterogeneous  
333 data sets. *Journal of bacteriology*, **185**, 6392-6399.
- 334 20. Jeong, K. S., Ahn, J. and Khodursky, A. B. 2004, Spatial patterns of  
335 transcriptional activity in the chromosome of Escherichia coli. *Genome biology*,  
336 **5**, R86.
- 337 21. Wichert, S., Fokianos, K. and Strimmer, K. 2004, Identifying periodically  
338 expressed transcripts in microarray time series data. *Bioinformatics*, **20**, 5-20.
- 339 22. Postow, L., Hardy, C. D., Arsuaga, J. and Cozzarelli, N. R. 2004, Topological  
340 domain structure of the Escherichia coli chromosome. *Genes Dev*, **18**,  
341 1766-1779.
- 342 23. Abel, J. and Mrazek, J. 2012, Differences in DNA curvature-related sequence  
343 periodicity between prokaryotic chromosomes and phages, and relationship to  
344 chromosomal prophage content. *BMC genomics*, **13**, 188.
- 345 24. Dorman, C. J. 2013, Genome architecture and global gene regulation in bacteria:  
346 making progress towards a unified model? *Nature Reviews Microbiology*, **11**,  
347 349-355.
- 348 25. Yama, K., Matsumoto, Y., Murakami, Y., et al. 2015, Functional specialization in  
349 regulation and quality control in thermal adaptive evolution. *Genes to cells :  
350 devoted to molecular & cellular mechanisms*.
- 351 26. Kurokawa, M. and Ying, B. W. 2017, Precise, High-throughput Analysis of

- 352 Bacterial Growth. *J Vis Exp*.
- 353 27. Ying, B. W., Seno, S., Kaneko, F., Matsuda, H. and Yomo, T. 2013, Multilevel  
354 comparative analysis of the contributions of genome reduction and heat shock to  
355 the Escherichia coli transcriptome. *BMC genomics*, **14**, 25.
- 356 28. Ying, B. W., Yama, K., Kitahara, K. and Yomo, T. 2016, The Escherichia coli  
357 transcriptome linked to growth fitness. *Genom Data*, **7**, 1-3.
- 358 29. Furusawa, C., Ono, N., Suzuki, S., Agata, T., Shimizu, H. and Yomo, T. 2009,  
359 Model-based analysis of non-specific binding for background correction of  
360 high-density oligonucleotide microarrays. *Bioinformatics*, **25**, 36-41.
- 361 30. Ono, N., Suzuki, S., Furusawa, C., et al. 2008, An improved physico-chemical  
362 model of hybridization on high-density oligonucleotide microarrays.  
363 *Bioinformatics*, **24**, 1278-1285.
- 364 31. Ihaka, R. and Gentleman, R. 1996, R: A language for data analysis and graphics.  
365 *Journal of computational and graphical statistics*, **5**, 299-314.
- 366 32. Ying, B. W., Seno, S., Matsuda, H. and Yomo, T. 2017, A simple comparison of  
367 the extrinsic noise in gene expression between native and foreign regulations in  
368 Escherichia coli. *Biochemical and biophysical research communications*, **486**,  
369 852-857.
- 370 33. Allen, T. E., Price, N. D., Joyce, A. R. and Palsson, B. O. 2006, Long-range  
371 periodic patterns in microbial genomes indicate significant multi-scale  
372 chromosomal organization. *PLoS computational biology*, **2**, e2.
- 373 34. Muskhelishvili, G., Forquet, R., Reverchon, S., Meyer, S. and Nasser, W. 2019,  
374 Coherent Domains of Transcription Coordinate Gene Expression During  
375 Bacterial Growth and Adaptation. *Microorganisms*, **7**, 694.
- 376 35. Meyer, S., Reverchon, S., Nasser, W. and Muskhelishvili, G. 2018,  
377 Chromosomal organization of transcription: in a nutshell. *Curr Genet*, **64**,  
378 555-565.
- 379 36. Sobetzko, P., Travers, A. and Muskhelishvili, G. 2012, Gene order and  
380 chromosome dynamics coordinate spatiotemporal gene expression during the  
381 bacterial growth cycle. *Proceedings of the National Academy of Sciences of the  
382 United States of America*, **109**, E42-50.
- 383 37. Espeli, O., Mercier, R. and Boccard, F. 2008, DNA dynamics vary according to  
384 macrodomain topography in the E. coli chromosome. *Molecular microbiology*,  
385 **68**, 1418-1427.
- 386 38. Niki, H., Yamaichi, Y. and Hiraga, S. 2000, Dynamic organization of  
387 chromosomal DNA in Escherichia coli. *Genes Dev*, **14**, 212-223.

- 388 39. Valens, M., Penaud, S., Rossignol, M., Cornet, F. and Boccard, F. 2004,  
389 Macrodomain organization of the Escherichia coli chromosome. *EMBO J*, **23**,  
390 4330-4341.
- 391 40. Boccard, F., Esnault, E. and Valens, M. 2005, Spatial arrangement and  
392 macrodomain organization of bacterial chromosomes. *Molecular microbiology*,  
393 **57**, 9-16.
- 394 41. Dillon, S. C. and Dorman, C. J. 2010, Bacterial nucleoid-associated proteins,  
395 nucleoid structure and gene expression. *Nat Rev Microbiol*, **8**, 185-195.
- 396 42. Monk, J. and Palsson, B. O. 2014, Genetics. Predicting microbial growth.  
397 *Science*, **344**, 1448-1449.

398 **Figure legends**

399 **Figure 1 Chromosomal periodicity of the transcriptome.** **A.** All transcriptomes used  
400 in the present study. The transcriptional levels of every 1 kb sliding window and 100 kb  
401 smoothing are shown. The color variation indicates the transcriptomes of individual  
402 strains. **B.** Periodograms of the transcriptomes. Two transcriptomes with different  
403 growth rates are shown. The growth rates,  $r$ , are indicated in the insets. The left and  
404 right panels represent the distributions of the Fourier-transformed periodic wavelengths  
405 on a logarithmic scale and the estimated chromosomal periodicity of the transcriptome,  
406 respectively. The broken lines and solid curves in red indicate the highest power spectra  
407 (the max-peak) estimated by the Fourier transform and the corresponding fitted period  
408 of the transcriptome, respectively. The transcriptional levels for every 1 kb sliding  
409 window and 100 kb smoothing are shown. **C.** Distribution of the periods corresponding  
410 to the max-peak. Orange and blue indicate the ratios of the six periods and the single  
411 period among the 213 total transcriptomes, respectively. **D.** Overlapping periods of the  
412 transcriptomes. The chromosomal periodicity of 202 transcriptomes showing six periods  
413 (orange in **C**) were plotted together. The color variation corresponds to that shown in **A**.

414  
415 **Figure 2 Correlation between the chromosomal periodicity and the growth rate.** **A.**  
416 Illustration of the parameters defined for the periodic transcriptome. The parameters (**a**,  
417 **b** and **c**) used in Eq. 1 are indicated. Black and red lines represent the transcriptome and  
418 the fitted period, respectively. **B.** Scatter plot of the amplitude of the six periods and the  
419 growth rate. The standard errors of the biological replicates are indicated. The  
420 correlation coefficient and its significance are indicated. **C.** Relationships among the  
421 parameters defined for the chromosomal periodicity and the growth rate. The  
422 relationship between any two of **a**, **b**, **c** and  $r$  is shown in matrix form. Pink, blue, green  
423 and purple represent the environmental variations in temperature, osmotic pressure, and  
424 nutritional level and normal conditions, respectively.

425  
426 **Figure 3. Comparison of the common periodicity of the transcriptomes to**  
427 **chromosome structures.** **A.** Relationship between the chromosomal macrodomains and  
428 the periodic transcriptomes. The normalized periodic transcriptomes are shown. Four  
429 macrodomain regions and two nonstructural regions are shown in solid color and as  
430 transparent, respectively. The macrodomains of the Ori, Right, Ter and Left regions are  
431 shown in green, red, light and dark blue, respectively. **B.** Scatter plot of the  
432 transcriptome versus GyrA binding activity in MG1655. Standardization of both the  
433 mean expression levels and the GyrA Chip-seq data were performed by determining the

434 z-score. The correlation coefficients and the statistical significance are indicated. **C.**  
435 Comparison of the transcriptome and the GyrA binding activity of the wild-type  
436 genome MG1655. Red and black curves indicate GyrA binding activity and the  
437 transcriptome, respectively. Both were calculated using a 1 kb sliding window and are  
438 shown according to the 100-kb moving average.

439

440 **Figure 4 Scheme of the correlation between the growth rate and the chromosomal**  
441 **periodicity of the transcriptome.** Shaded boxes indicate the profiles of the whole  
442 transcriptome and the corresponding population dynamics. The broken and solid curves  
443 in the upper box indicate the small and large amplitudes of the periodic transcriptomes,  
444 respectively, and those in the bottom box indicate slow and fast growth, respectively.

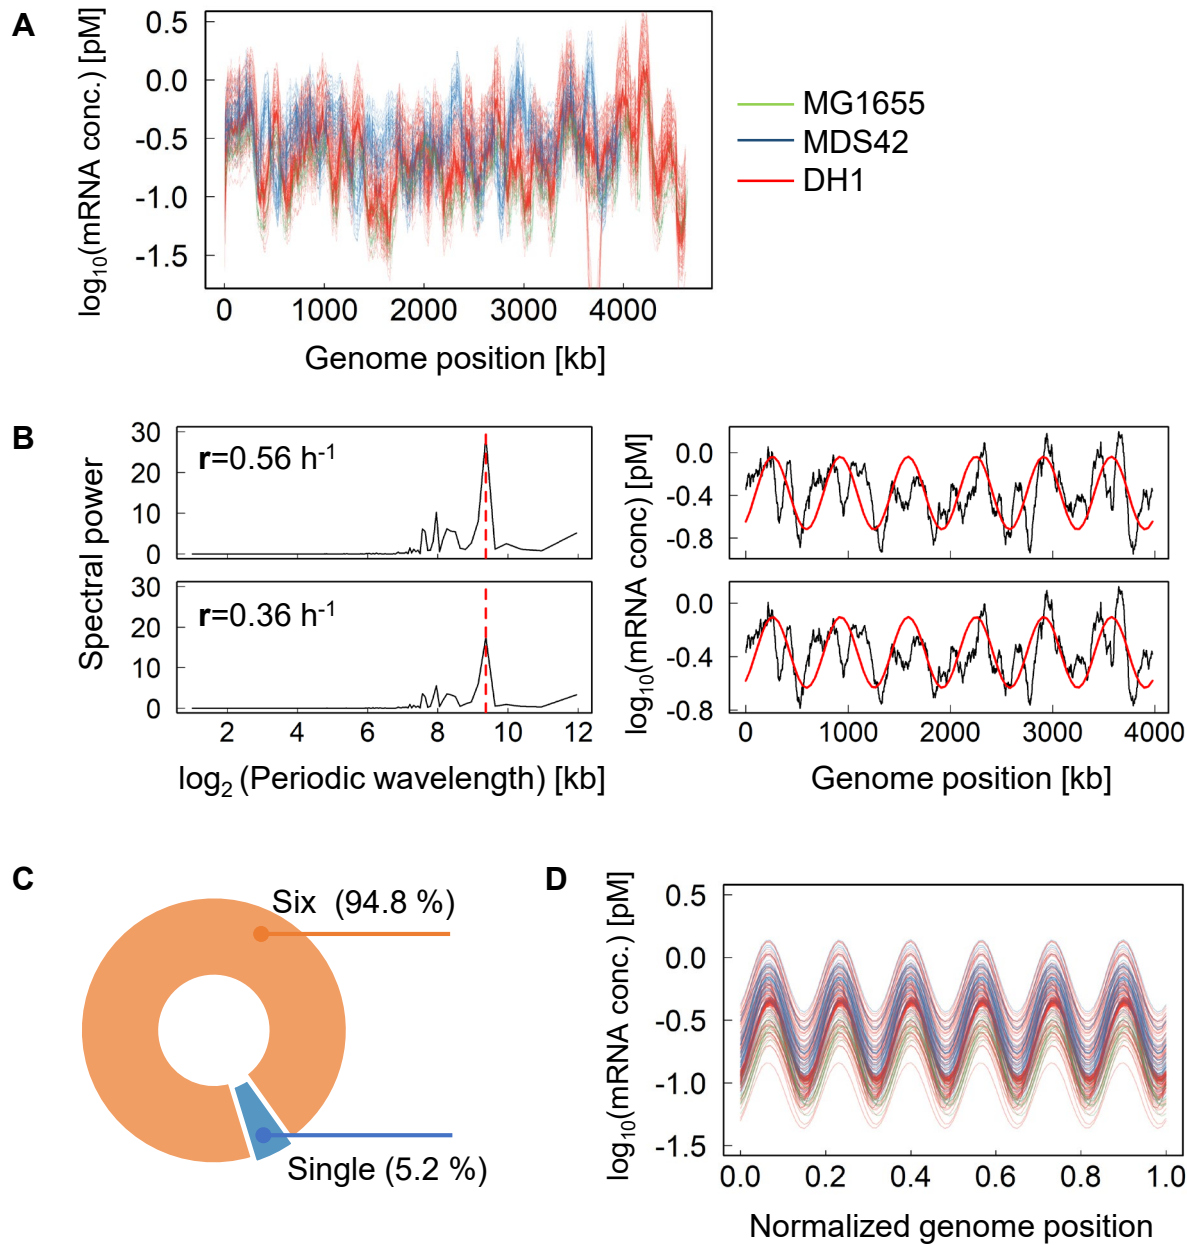

Figure 1



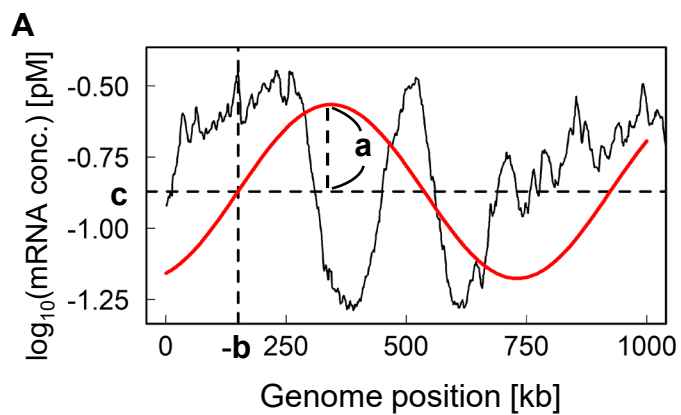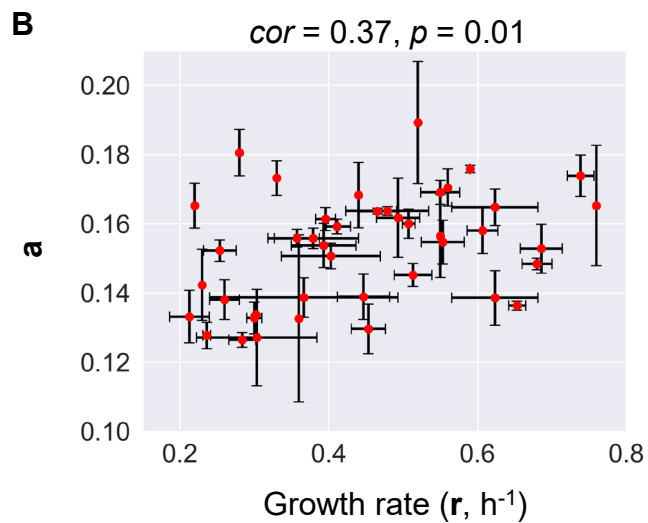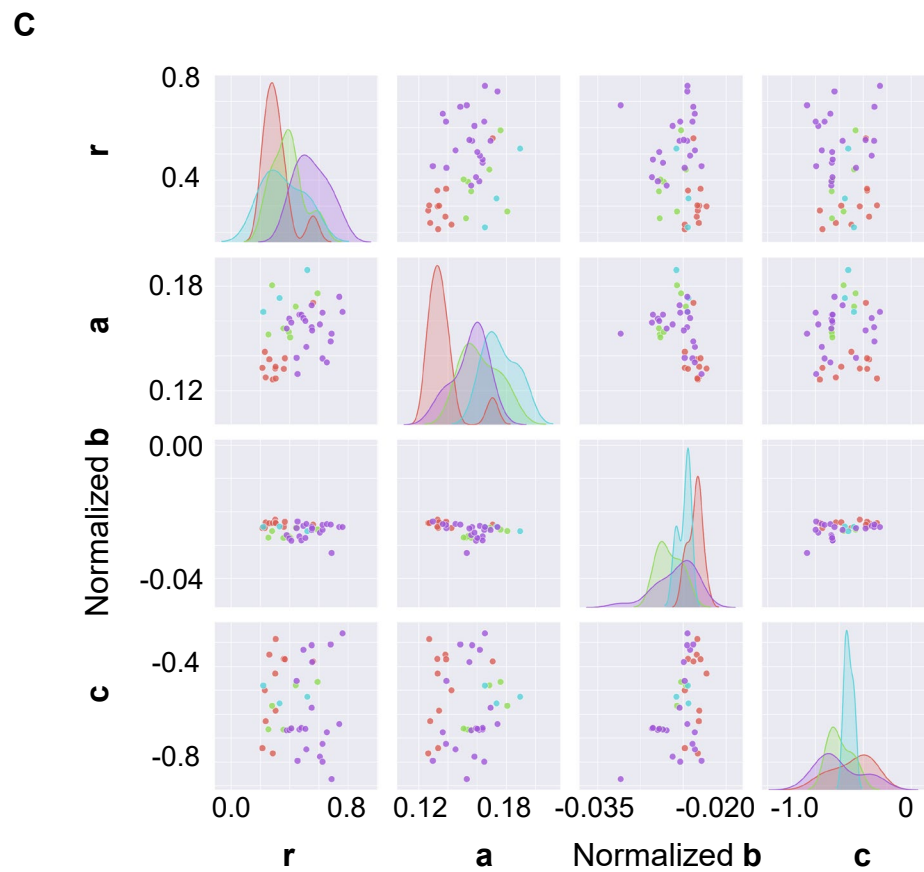

Figure 2

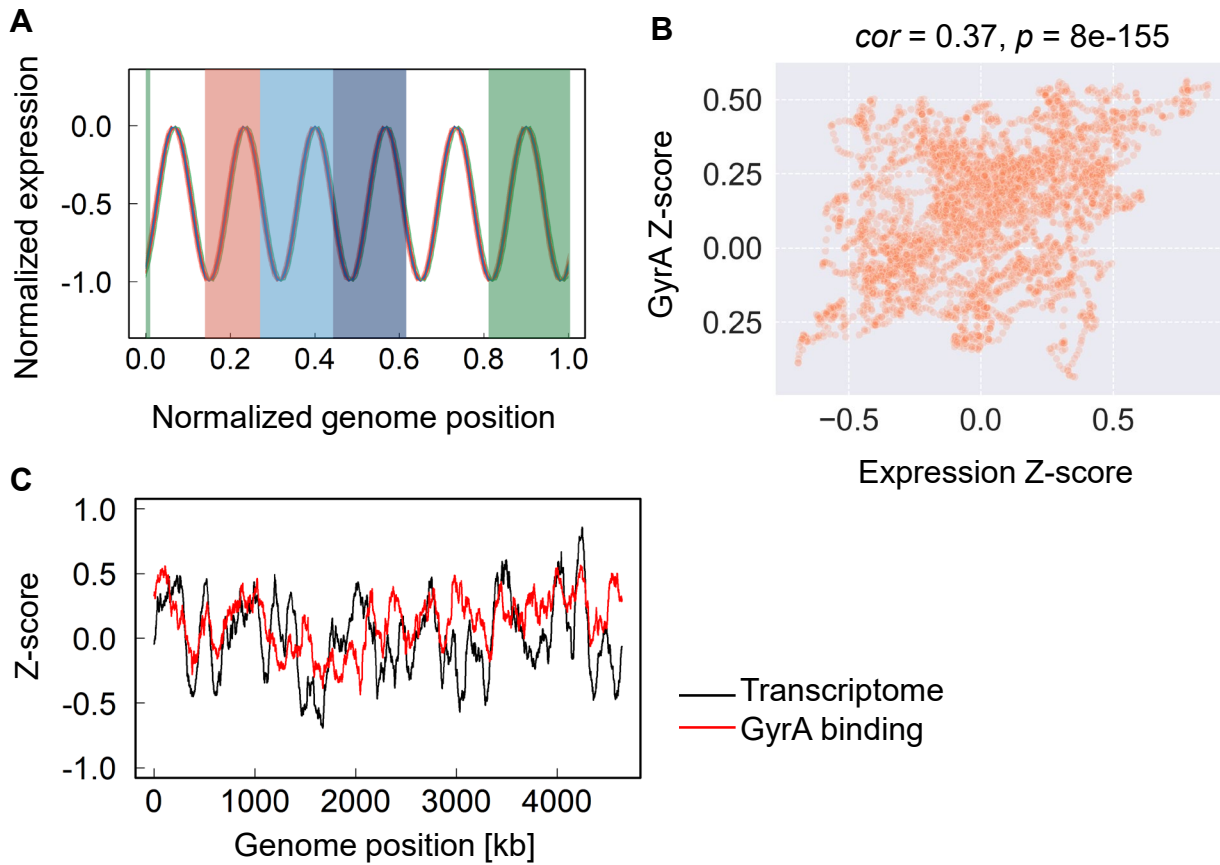

Figure 3

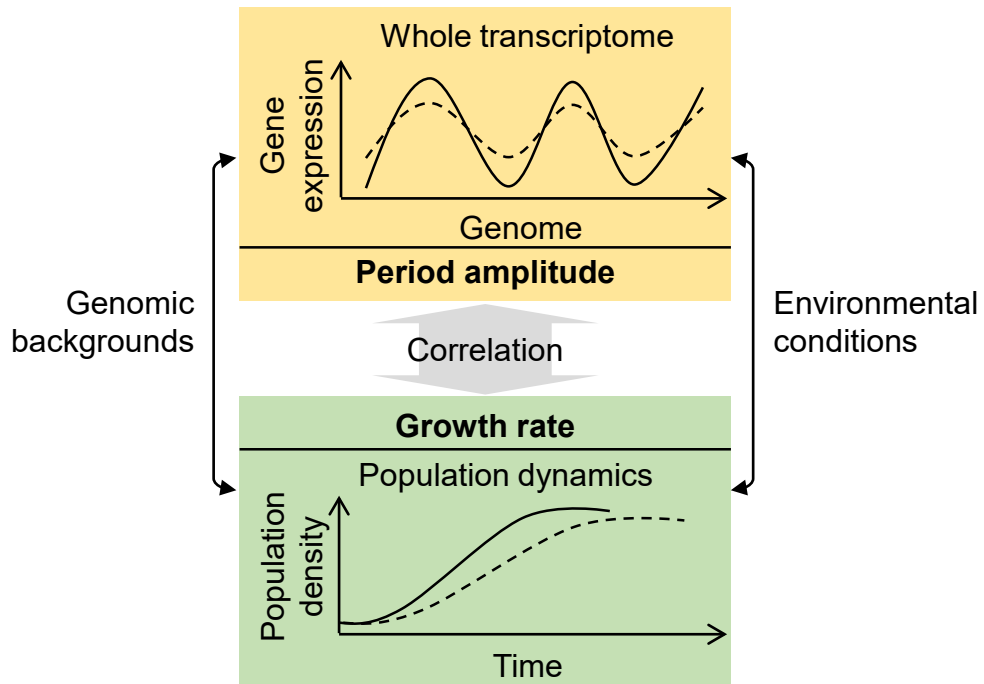

Figure 4
